# Supplementary material for: Deep Learning Based Object Tracking in Walking Droplet and Granular Intruder Experiments
Source: Research Square preprint supplement (doi:10.21203/rs.3.rs-2692860/v1), 2023-03-20
Supplement: Supplementary file 1 [file droplet-supp-material.pdf › droplet-supp-material.pdf]

# Deep Learning Based Object Tracking in Walking Droplet and Granular Intruder Experiments

## Supplemental Document

Erdi Kara,<sup>\*,†</sup> George Zhang,<sup>‡</sup> Joseph J. Williams,<sup>†</sup> Gonzalo Ferrandez-Quinto,<sup>†§</sup>  
Leviticus J. Rhoden,<sup>¶</sup> Maximilian Kim,<sup>||</sup> J. Nathan Kutz,<sup>†\*\*,††</sup> Aminur Rahman<sup>†</sup>

This document provides additional supporting material for the research presented in the main body of our paper. The codes, datasets, and results discussed in this study are available in our GitHub repository [1].

## 1 Additional Details Regarding for Model Training

### 1.1 Object Detection via YOLO

YOLO frames the object detection problem as a regression task. As a supervised machine learning framework, YOLO must be optimized on a training dataset. In this case, the training data is composed of images and bounding box coordinates of the object classes present in each image. Each input image is divided into  $S \times S$  regular rectangular grids. For each grid, the model predicts  $B$  bounding boxes represented by the box center coordinates (relative to the cell) and the width and height (relative to the entire image). A confidence score  $CS$  and conditional class probability  $Pr(C_i)$  are also part of the model output. Confidence score  $CS$  is calculated as

$$CS = Pr(Object) \cdot IOU \quad (1)$$

where  $Pr(Object)$  indicates the probability that the grid contains an object belonging to any of the pre-defined classes. While values close to 0 indicate the absence of an object in that particular grid, values close to 1 point to the presence of an object. The *intersection-over-union* (IOU) is one of key metrics in object detection problems that measures the degree of overlap (0 being no overlap, 1 being complete overlap) between the bounding box prediction and the ground truth bounding box. In model training or testing stages, one can set certain IOU threshold values to decrease the number of false positive identifications. The conditional class probability is computed as

$$Pr(C_i) = Pr(C_i|Object), \text{ for } i = 1, 2, \dots, N \quad (2)$$

where  $N$  is the number of classes.  $Pr(C_i)$  is a direct measure of the probability of the object belonging to the class  $C_i$ . The model outputs one set of probabilities per grid. Note that if the grid does not

---

<sup>\*</sup>Corresponding Author, [erdikara@spelman.edu](mailto:erdikara@spelman.edu)

<sup>†</sup>Department of Mathematics, Spelman College

<sup>‡</sup>Department of Applied Mathematics, University of Washington

<sup>§</sup>Department of Physics, University of Washington

<sup>¶</sup>Department of Mechanical Engineering, University of Washington

<sup>||</sup>Department of Civil and Environmental Engineering, University of Washington

<sup>\*\*</sup>Department of Electrical Engineering, University of Washington

<sup>††</sup>AI Institute in Dynamic Systems, University of Washington

contain any object,  $Pr(C_i)$  must be zero. As a result, for a single image, YOLO produces a tensor of size  $S \times S \times (5B + N)$ , which is the prediction of the output layer of the YOLO network. Finally, this output is passed through a Non-Maximal suppression algorithm, eliminating the bounding boxes with low confidence scores. Once the output is obtained, YOLO computes the error via a *multi-component* loss function which is composed of localization error for bounding box predictions and the classification error for conditional class probabilities [2]. The confidence score associated with each box is readily available during training phase. In testing time, it is a predicted quantity calculated by the network. For droplets and intruders, the number of classes  $N = 1$ . Thus, whenever the object is predicted present in the image, the confidence score reduces to *IOU*.

We lastly discuss the concept of *mean average precision (mAP)* which is one of the most common metrics used in object detection problems. This is a single number between 0 and 1 measuring the accuracy of the network across the dataset in consideration. To compute mAP, we first calculate precision (P) and recall (R) using the following formula

$$P = \frac{TP}{TP + FP} \quad , \quad R = \frac{TP}{TP + FN} \quad (3)$$

In (3), TP represents the number of true positives, i.e, droplet is present and detected while TN indicates the number of true negatives, i.e, droplet is not present and not detected. FN is the number of false negatives, i.e, the droplet is present but not detected while FP is the number of false positives, i.e. the droplet is not present but detected. Notice that to classify a detection as TP or FP, a threshold value must be imposed. In the object detection problem, it is very common to choose an IOU to set this threshold. In this work, we report the mAP metric with the threshold value  $IOU = 0.5$ . In other words, whenever  $IOU \geq 0.5$ , we classify this detection as a true positive. Once we set the threshold value, we obtain precision and recall values and consider precision as a function of recall. Formally, the average precision (AP) is defined as

$$AP = \int_0^1 P(r)dr \quad (4)$$

where mAP is calculated among all predefined object classes in the dataset. This metric is known as  $mAP@.5$  when the threshold is set to  $IOU = 0.5$ . Another common metric is  $mAP@[.5:.95]$ . In this case, IOU threshold is varied from 0.5 to 0.95 and mAPs registered for each separate threshold are averaged out to obtain a single  $mAP@[.5:.95]$  score.

As outlined in the main body of the paper, we trained two different models for walking droplet and granular intruder experiments. We reported the training and testing scores associated with each experiment in Table-5 therein. Fig-1 demonstrates the evolution of  $mAP@.5$  and  $mAP@[.5:.95]$  over the course of model training. In both cases, we can observe that the  $mAP@.5$  values gradually increase and saturate around 1 which points to a near perfect performance.

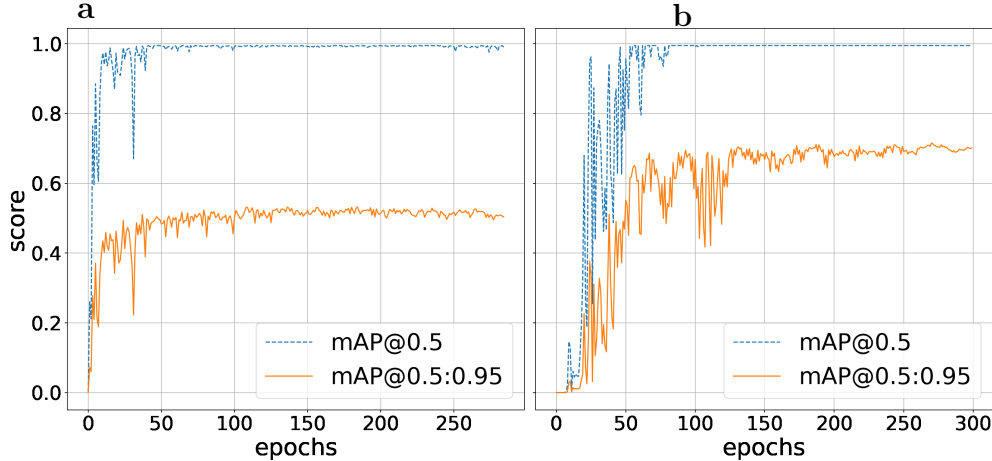

Figure 1: Training performance of the droplet model (a) and granular flow model (b). The yellow solid curve (bottom) represents the performance of mAP@0.5:0.95 and the blue dashed curve (top) represents the performance of mAP@0.5.

## 1.2 Number of Training Images

Data preparation is a major bottleneck in supervised machine learning. In particular, manual annotation of training images in object detection problems is a labor-intensive process. For our experimental settings, Table-6 and Table-7 in the main body of our paper indicate that we can achieve near-perfect detection accuracy with around 120 training images for droplet experiments and 30 training images for granular flow experiments. Note that these are just a tiny fraction of the total number of frames in the corresponding video sources. However, one can determine the approximate number of training images that will likely yield a high detection rate prior to actual model training. Such an investigation would be particularly useful in cutting annotation time if qualitatively similar experiments are to be carried out multiple times. One way of investigating the optimal number of images would be to gradually increase the number of training images by respecting 70%:20% ratio between them and keeping the same number of testing images. We can then plot mean average precision as the function of the number of training images and analyze if the function displays an asymptotic behavior around a mAP score of 1. For example, let us consider the Control experiment for which we initially created 120 training, 34 validation and 17 testing images. We can fix the validation and testing data and train the model by gradually increasing the number of training images from 5 images to 120 images and each time keeping appropriate number of validation images. For each training cycle, we use the very same 17 testing images. Since this is just a preliminary investigation, we set the number of epochs to 50 for each training cycle. Figure-2 displays the results of this investigation for the Control (left) and Three Droplets (right) experiments. In both cases, we can observe the mAP@0.5 values fluctuating around 1 when the number of training images exceeds 60. Based on similar investigations of other experiments, we set the number of training images to a conservative estimate of 120.

Recall that we trained a single model for the dataset that is composed of around 120 training images taken from each experiment. However, one can use fewer number of images if the goal is to train a separate model for each experiment. For example, the right panel in Fig-2 indicates that one can employ around 50 training images for Three Droplets experiment without compromising from the model performance. This is indeed correct. With 50 training, 14 validation and 7 testing images, it takes around 3.5 minutes to train the model and the model still achieves 99.28% detection rate. We should also note that the very same model trained for Three Droplets equally performs for Control experiment but not for Lights Off

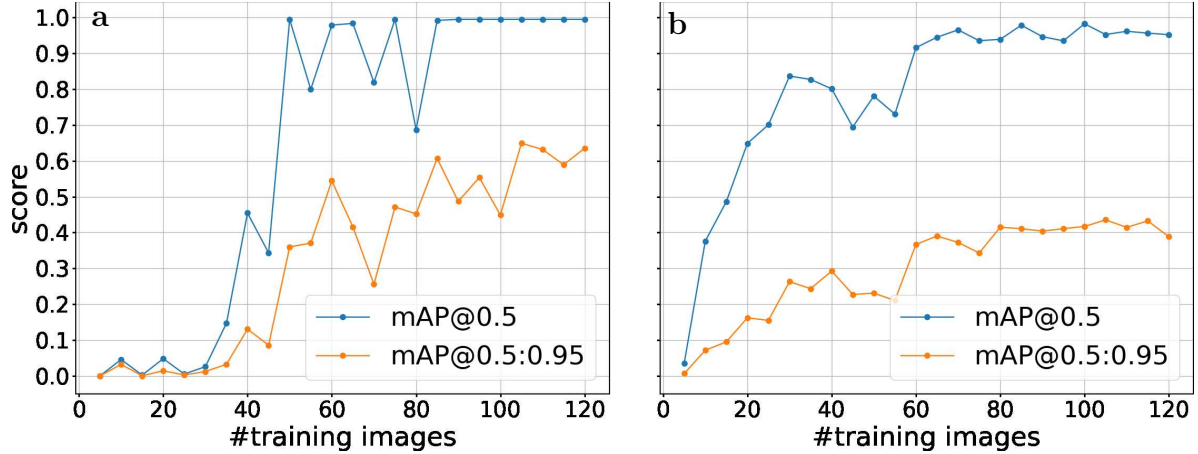

Figure 2: Model performance of the Control (a) and three droplet (b) experiments. The yellow solid curve (bottom) represents the performance of  $\text{mAP}@0.5:0.95$  and the blue dashed curve (top) represents the performance of  $\text{mAP}@0.5$ .

or Corral White. This difference can be explained by the degree of variability between the experiments. Therefore, it may be more practical to train a single model in case of multiple experiments rather than dealing with training multiple models.

### 1.3 Object Tracking with Hungarian Algorithm vs StrongSORT

In the main body of our paper, we provided an extensive comparison between Hungarian Algorithm and StrongSORT approaches to track the object of interests detected by YOLO. We now present supplementary analysis. We consider one 10 second segment of the Three Droplet experiment where the droplets are closely interacting with each other. We first annotated the frames corresponding to this time window to obtain the ground truth trajectories of each individual droplet. We then separately obtained tracking results for both the Hungarian Algorithm and StrongSORT.

In Fig.-3, the background image is the very last frame of the approximately 10 second video segment. The top and bottom figures show the trajectories of two different droplets. Green discs and squares mark the initial and terminal points of the corresponding ground truth trajectory, respectively. Thus, the droplet in consideration overlaps with the green square marker. The figures on the left column display the trajectories obtained via the Hungarian Algorithm while figures on the right column display the StrongSORT trajectories, both of which are overlaid on the ground-truth trajectories. Due to an ID switch, StrongSORT fails to track the corresponding droplet and its trajectories end up at the wrong droplet ID by the end of the video segment.

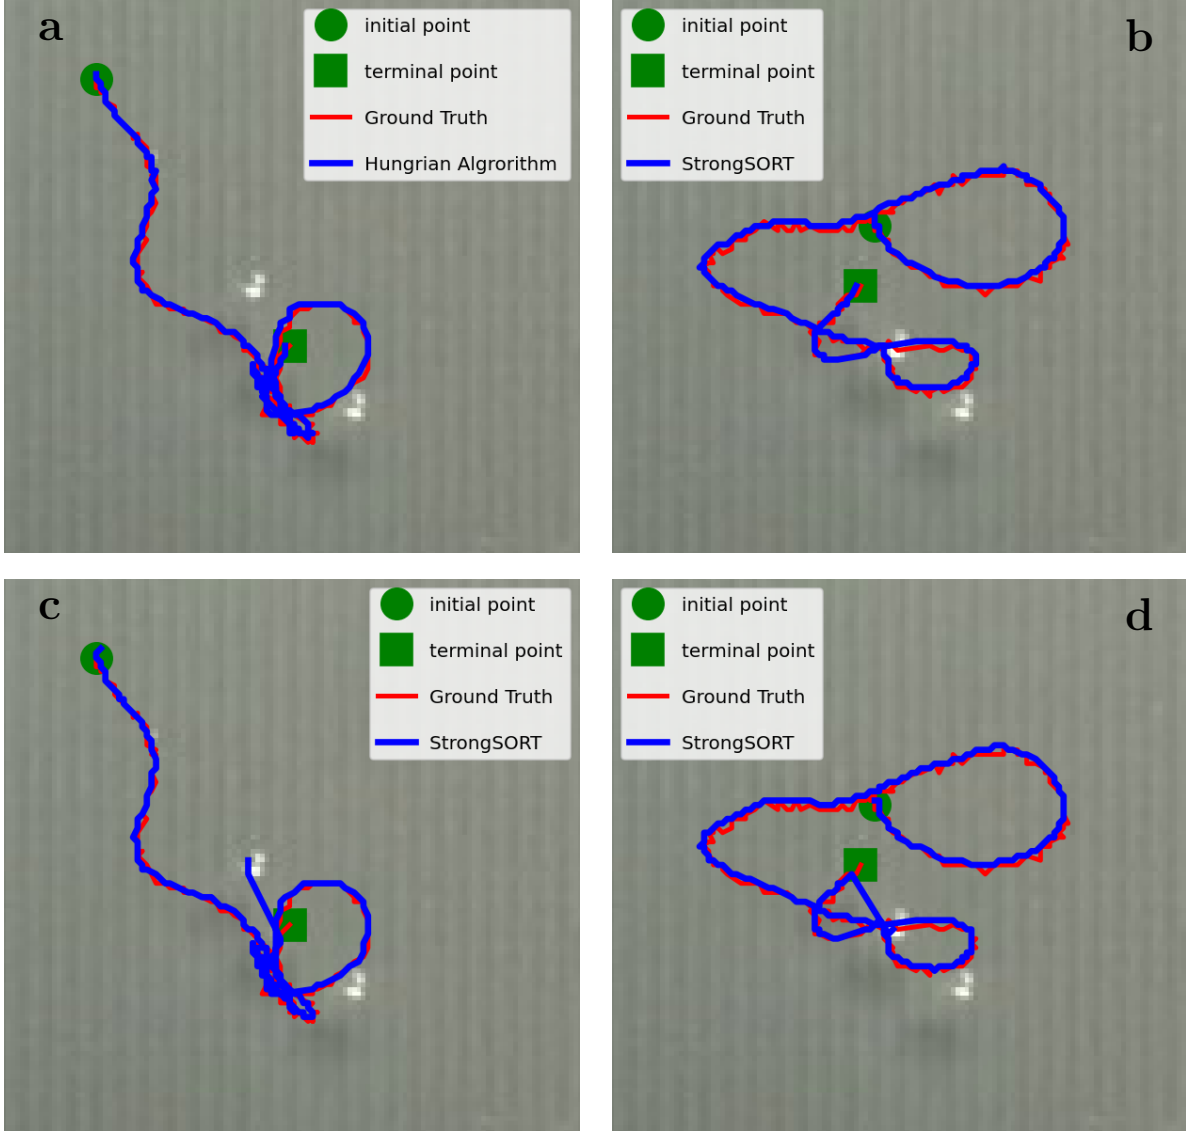

Figure 3: Ground-truth trajectories compared to trajectories produced by both the Hungarian Algorithm (a, c) and StrongSORT (b, d). (a, b) represent the first droplet, and (c, d) represent the second droplet.

## 2 Analysis of Droplet and Intruder Trajectories

The main body of our paper details the extraction of trajectories of object of interests in walking droplet and granular intruder experiments. Here, we present the complete set of results obtained from each experiment.

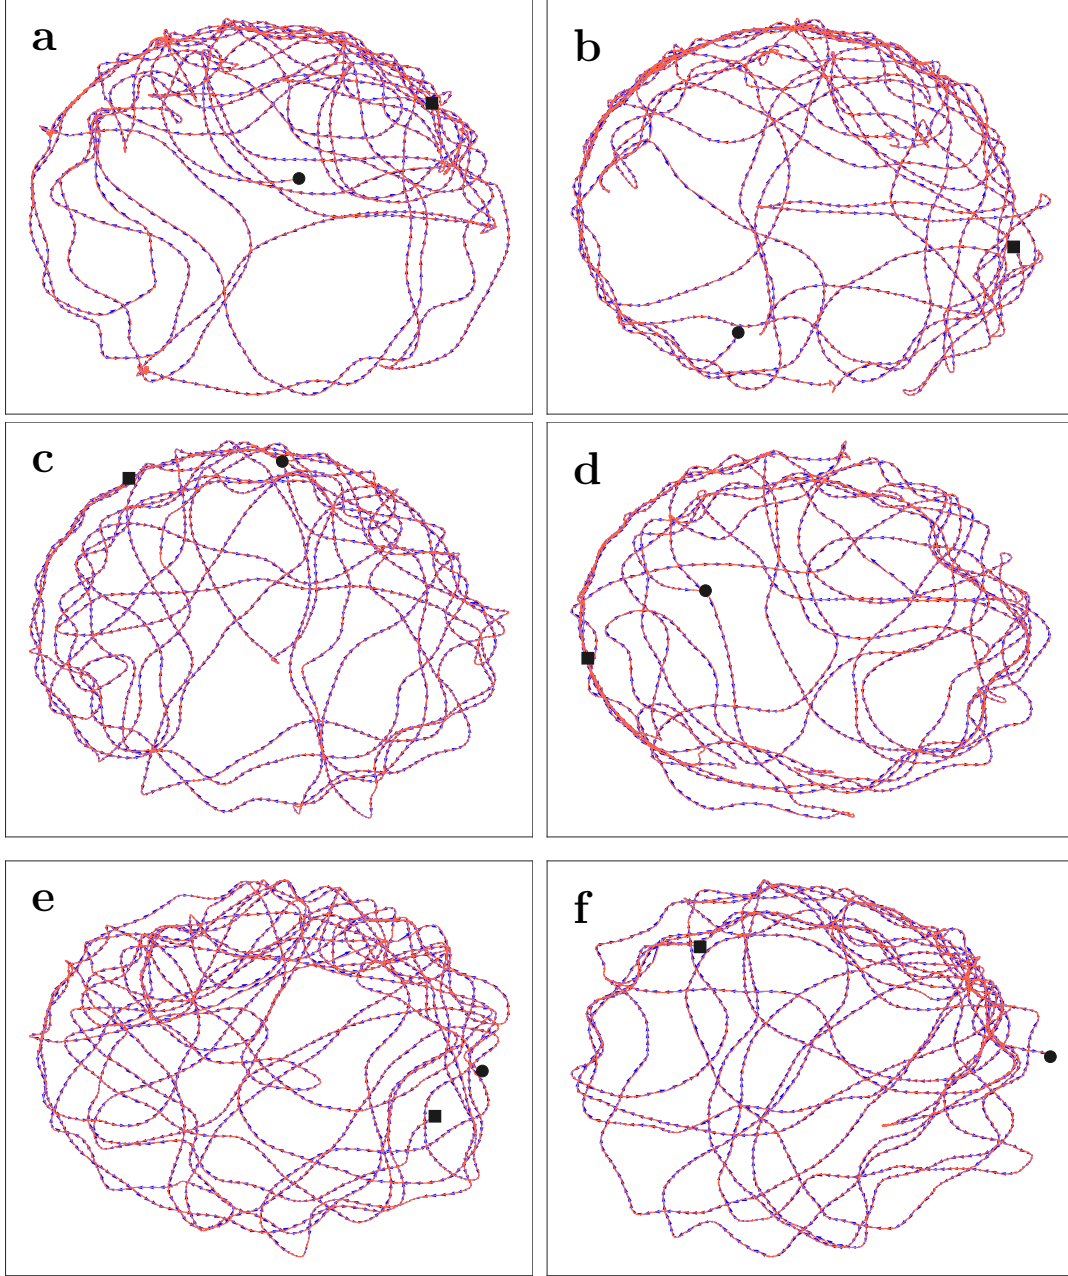

Figure 4: Flow map for single droplet experiments, “Control” (a), “Lights Off” (b), “Lights Low” (c), “Lights High” (d), “Res Mid” (e), and “Res Low” (f) droplet experiments. The square and disc (black) markers represent the initial and terminal points of the motion.



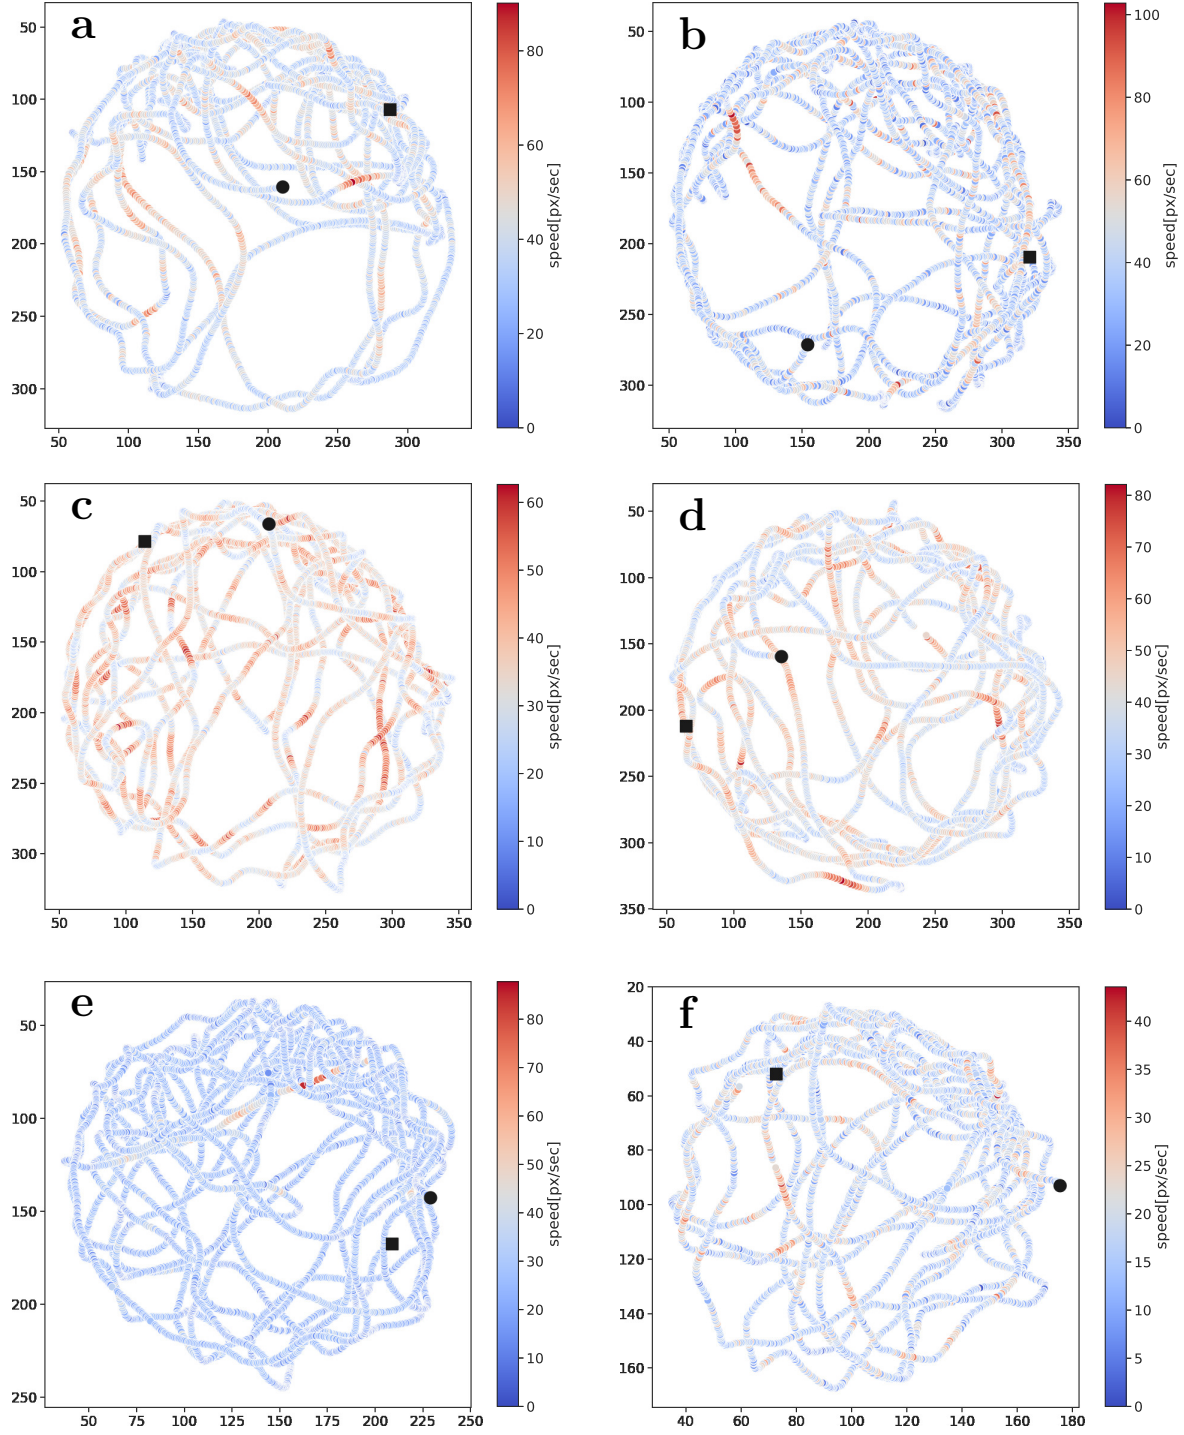

Figure 5: Speed map for single droplet experiments, “Control” (a), “Lights Off” (b), “Lights Low” (c), “Lights High” (d), “Res Mid” (e), and “Res Low” (f) droplet experiments. The speed of the droplet at each location (shown in Fig. 4) is represented by the color bars. The square and disc (black) markers represent the initial and terminal points of the motion.

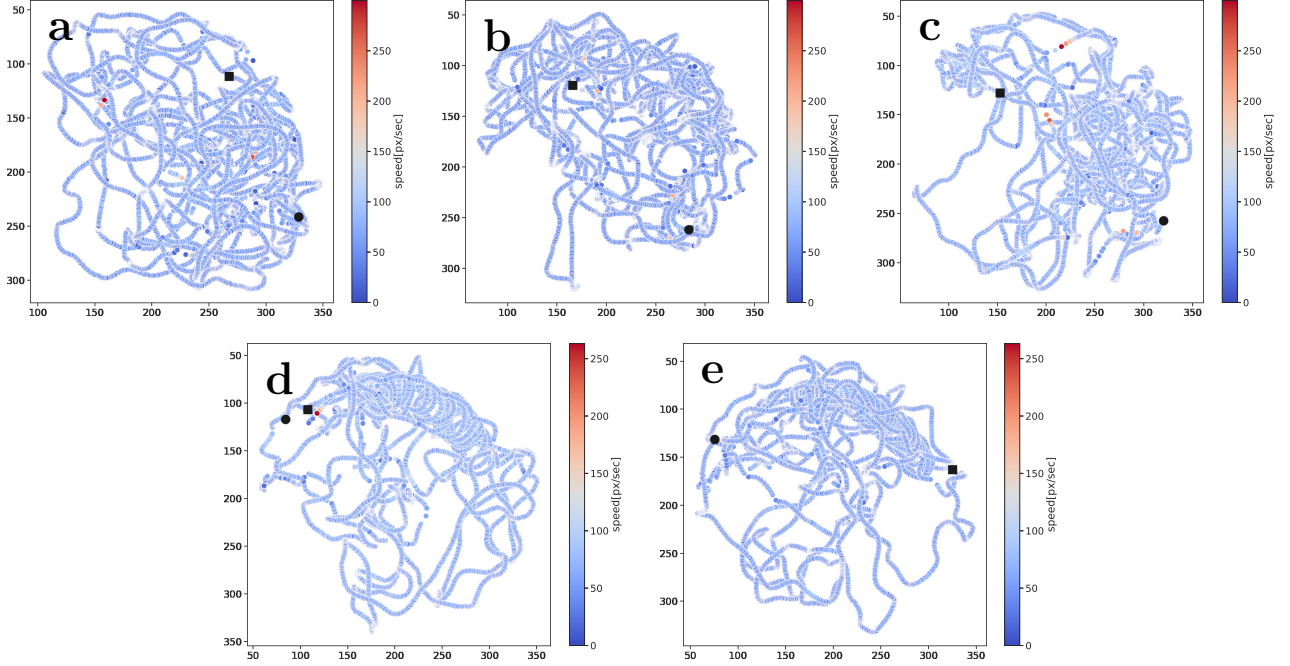

Figure 6: Speed map for multiple droplet experiments. Top row indicates the individual droplet trajectories for “Three Droplets“ experiment while the bottom row are the speed maps for the “Two Droplets“ experiment. The speed of the droplet at each location is represented by the color bars. The square and disc (black) markers represents the initial and terminal points of the motion.

In the Faraday experiment which was carried out above the Faraday threshold, one can visually confirm that the droplet motion occurs in the vicinity of its initial location. As seen in Fig-7, the walker bounces back and forth between certain locations. Relatively sparse and discrete red points surrounded by blue points indicate sharp speed changes (potentially sharp turns) at these locations.

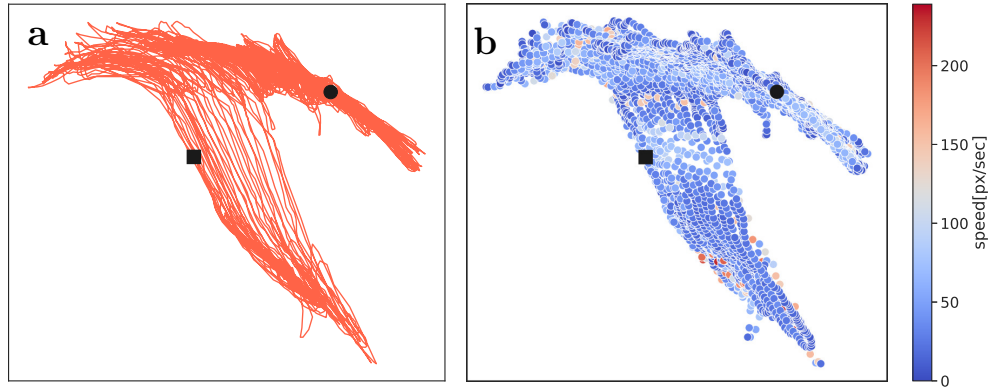

Figure 7: Location history (a) and speed map (b) for the above-threshold Faraday droplet experiment. Square and disc (black) markers represents the initial and terminal points of the motion.



Similarly, we can create inspect the speed map for the individual granular intruders.

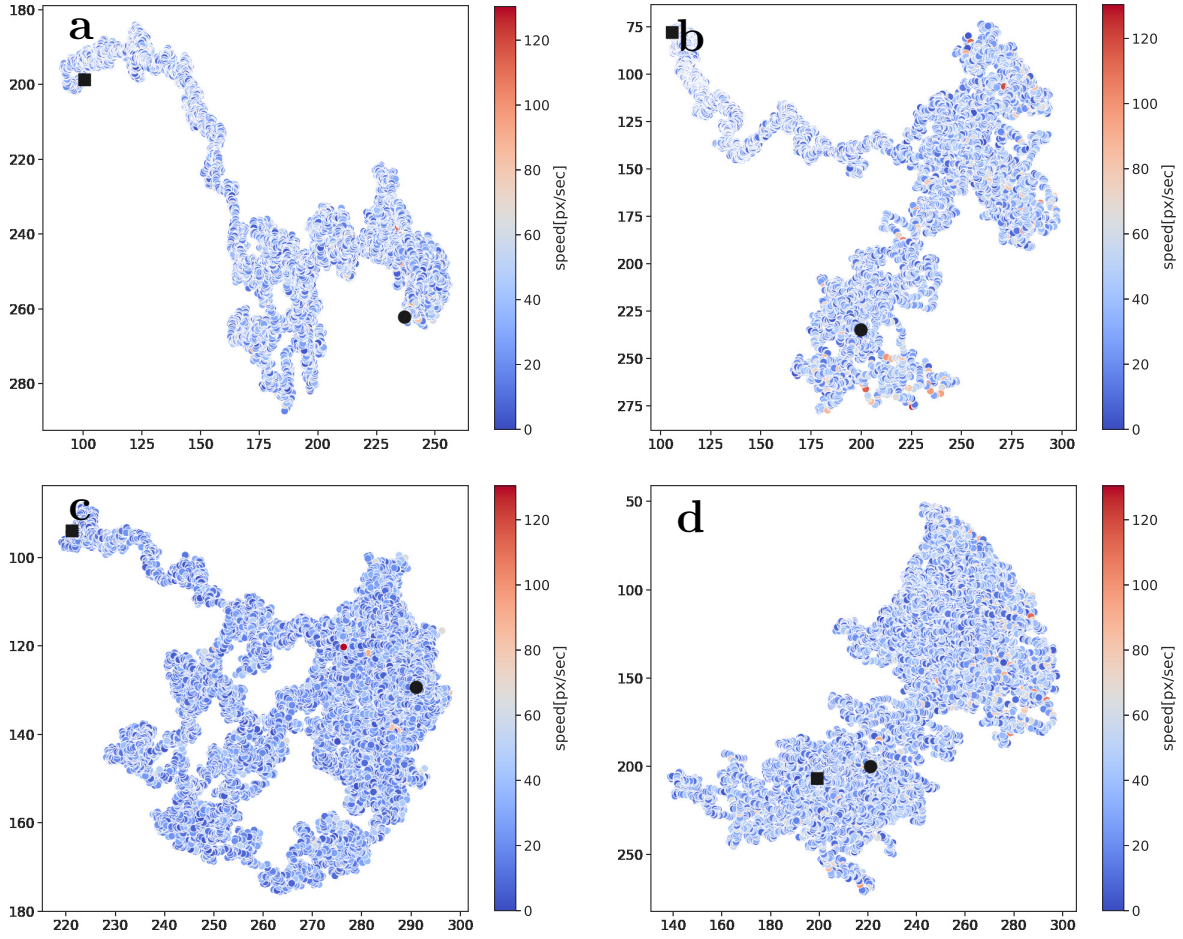

Figure 8: Speed map for "2white2black-long" granular experiment. The speed of the intruder at each location (shown in Fig. 4) is represented by the color bars. The square and disc (black) markers represents the initial and terminal points of the motion.

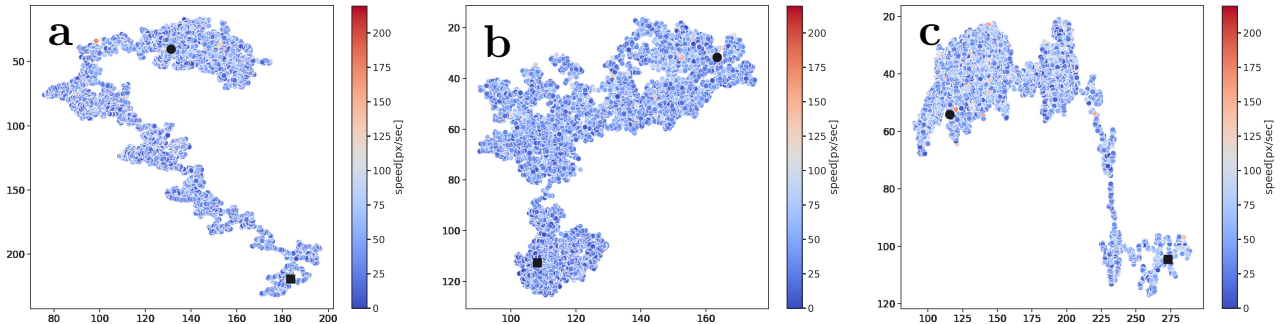

Figure 9: Speed map for "3white" granular experiment. The speed of the intruder at each location (shown in Fig. 4) is represented by the color bars. The square and disc (black) markers represents the initial and terminal points of the motion.

### 3 Conventional Detection Methods

In this section we detail the results of alternative detection methods performed on the walking droplet experiments. Specifically, we compare and contrast the performance of image processing, background subtraction, and the Viola-Jones methods under various experimental conditions. All of these methods, while more simplistic in nature than YOLOv5, come with drawbacks and can fail in some conditions.

#### A.1 Image Processing

Image processing algorithms apply operations or filters to images in order to extract meaningful information. In general, image processing algorithms do not need to be trained but do require a few parameters to be tuned for each experiment. Their simplicity comes at a cost, however. Most of the image processing methods suffer heavily from noise in the image and experimental setup. One procedure stood above the rest with optimistic results. In The combination of edge detection and Hough transform, after parameter tuning, reported high precision and recall on all videos except Res Mid and Faraday. This inconsistency is the trade off made when applying image processing algorithms in exchange for ease of use.

##### A.1.1 Hough Transform

The simplest of the image processing algorithms we applied is arguably the Hough transform. In Hough transform, shapes in the pixels of an image are identified through a voting procedure. This technique has been shown to detect circles within an image [3, 4, 5]. As our droplets appear mostly circular in the videos we captured, we will apply the Hough transform as a last step to all our image processing methods. We implement the Hough transform for circle detection by utilizing the built-in *imfindcircles* function in MATLAB. Using parameters  $RadiusRange = [2, 5]$ ,  $Sensitivity = 0.95$ , and  $EdgeThreshold = 0.15$  on the Control video, we obtained a recall of 0.98 and a precision of 0.48 within the corral region out of 50 frames throughout the video. We ignore false positives outside the corral region since we can safely assume droplets never escape the corral region. The parameters we chose maximized recall but introduced many false positives and therefore a low precision. Using parameters  $RadiusRange = [2, 5]$ ,  $Sensitivity = 0.96$ ,  $EdgeThreshold = 0.1$  on the Lights Off video, we obtained a recall of 1.00 and a precision of 0.93, which is an improvement over the control setup as much of the noise and imperfections in the background are no longer visible. However, there still remain a significant number of false positives. Having additional droplets do not seem to decrease the performance of the Hough Transform. In contrast, both lower resolution droplets and a white corral background decimate the performance. Perhaps unsurprisingly, the Hough Transform completely fails when detecting droplets in the Faraday video as the Faraday waves in the background produce too many false positives regardless of the parameters used. It is also important to note that in all of the cases, the region outside of the corral produced many false positives due to imperfections in the 3D printed corral which were not counted. Frames showing detections in various experimental conditions can be seen in Figure 10. Table 1 lists the results from the Hough Transform experiment.

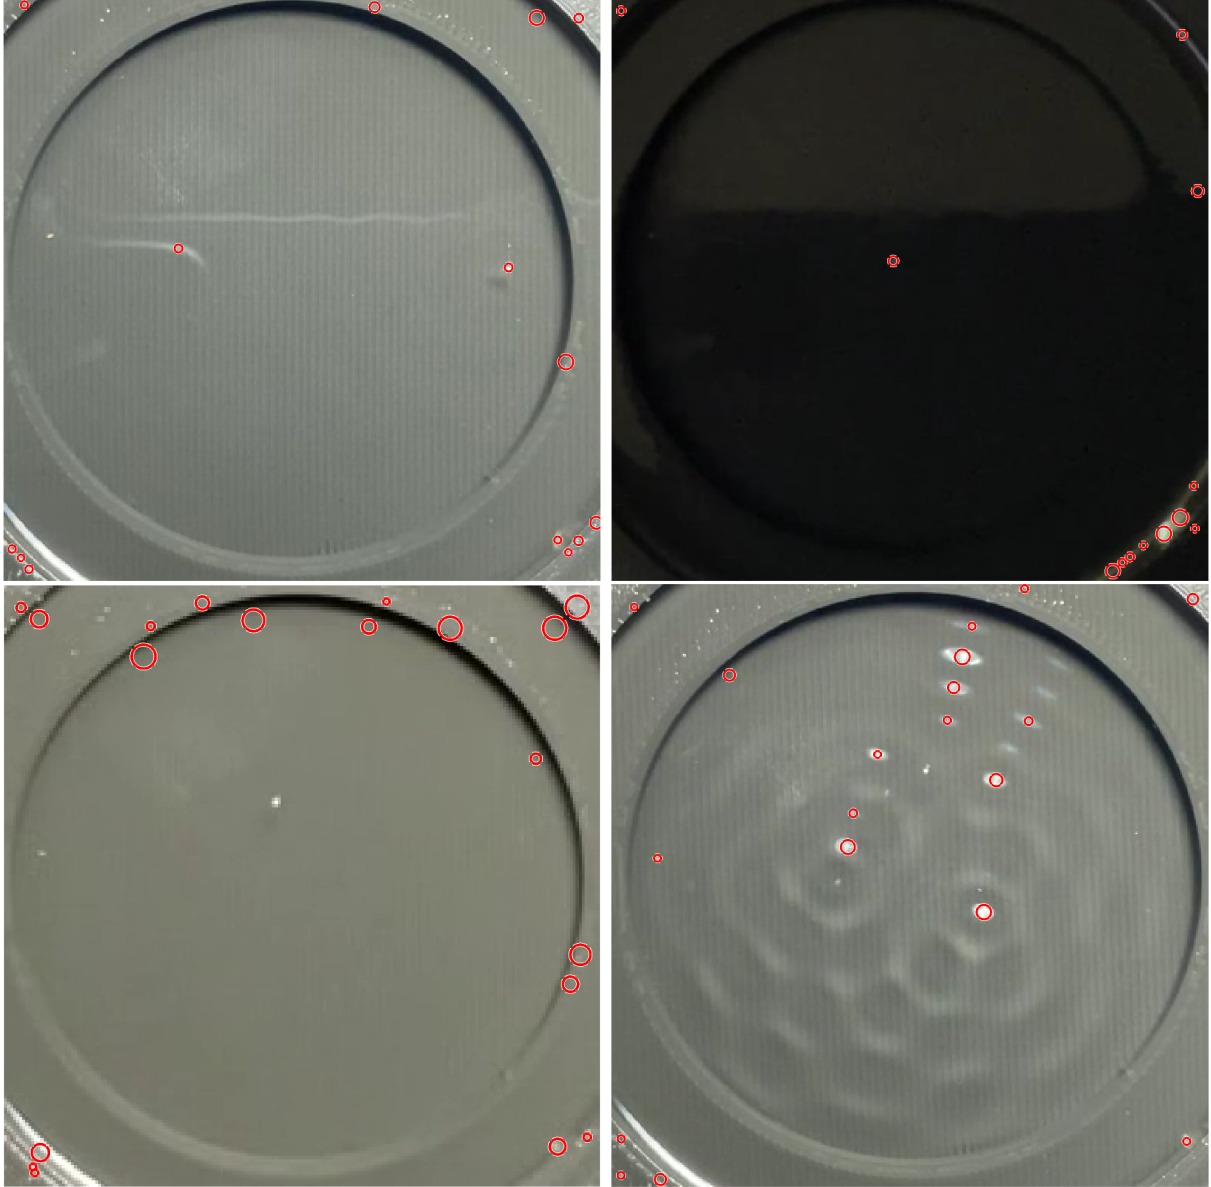

Figure 10: The upper left image shows a frame in the control video. In this frame, the droplet to the right of the corral is correctly detected but there is another false positive detection made within the corral region. Additionally, the imperfection to the left of the corral is at times mistaken for a droplet as well. The upper right image shows the Lights Off video, the lower left image shows the Res Low video, and the lower right image shows the Faraday video.

### A.1.2 Top-Hat Transform

One additional step we included to improve image processing performance was carrying out morphological operations prior to applying the Hough Transform. We applied the top-hat transform to reduce uneven lighting and to enhance the droplet shapes against the background [6]. The top-hat transform computes and subtracts the morphological opening of an image from itself. Figure 11 shows the results of the transform. The performance of the top-hat transform can be seen in Table 2. Overall, the inclusion of the top-hat transform significantly improved precision while keeping recall about the same (and in the case of

Table 1: Hough Transform Results

| Experiment     | RadiusRange | Sensitivity | EdgeThreshold | Recall | Precision |
|----------------|-------------|-------------|---------------|--------|-----------|
| Control        | [2 5]       | 0.95        | 0.15          | 0.98   | 0.48      |
| Lights Off     | [2 5]       | 0.96        | 0.1           | 1.00   | 0.93      |
| Lights Low     | [2 5]       | 0.95        | 0.15          | 0.98   | 0.74      |
| Lights High    | [2 5]       | 0.95        | 0.15          | 0.96   | 0.40      |
| Two Droplets   | [2 5]       | 0.95        | 0.15          | 0.98   | 0.66      |
| Three Droplets | [2 5]       | 0.95        | 0.15          | 0.97   | 0.87      |
| Res Low        | [1 4]       | 0.95        | 0.12          | 0.58   | 0.17      |
| Res Mid        | [2 5]       | 0.955       | 0.1           | 0.88   | 0.43      |
| Faraday        | X           | X           | X             | X      | X         |
| Corral White   | [2 5]       | 0.95        | 0.25          | 0.46   | 0.49      |

the Res Low video both recall and precision were improved). However, the detection is still not perfect, failing when applied to the Faraday video and performing poorly on the Corral White video. Additionally, precision is generally low under extreme lighting (Lights Low and Lights High) and lower resolutions (Res Low and Res Mid).

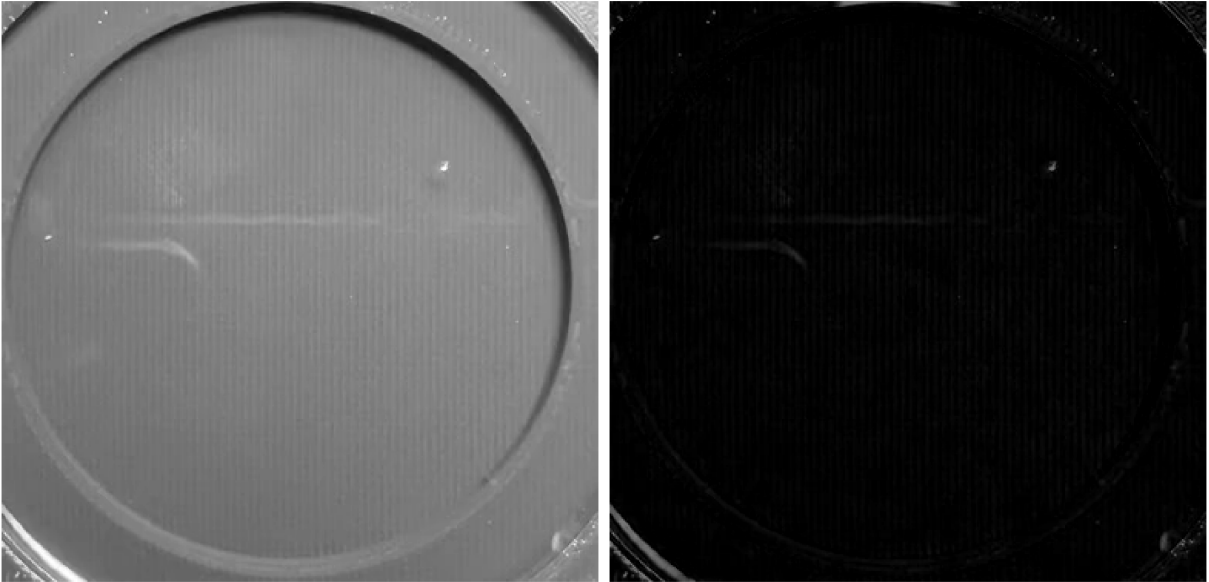

Figure 11: Before (left) and after (right) top-hat transform

### A.1.3 Edge Detection

We also experimented with applying edge detection before using *imfindcircles*. MATLAB already maintains a built-in *edge* function that we utilized [7]. After experimenting with available methods, we noted that the Canny method generally outperformed others at ignoring noise and imperfections within the image (see Figure 12). The Canny edge detection method is a multi-stage process that incorporates filters and thresholding to make accurate and reliable edge detections [8]. Again, the performance of edge detection is listed below in Table 3. Incorporating edge detection resulted in a improved performances compared to using the top-hat transform. This procedure only had trouble with the Res Mid and Corral

Table 2: Top-Hat Filtering Results

| Experiment     | THRradius | RadiusRange | Sensitivity | EdgeThreshold | Recall | Precision |
|----------------|-----------|-------------|-------------|---------------|--------|-----------|
| Control        | 5         | [2 5]       | 0.95        | 0.2           | 0.94   | 0.92      |
| Lights Off     | 5         | [2 5]       | 0.96        | 0.2           | 1.00   | 1.00      |
| Lights Low     | 5         | [2 5]       | 0.95        | 0.2           | 0.98   | 0.82      |
| Lights High    | 5         | [2 5]       | 0.95        | 0.2           | 0.94   | 0.87      |
| Two Droplets   | 5         | [2 5]       | 0.95        | 0.2           | 0.95   | 0.92      |
| Three Droplets | 5         | [2 5]       | 0.95        | 0.2           | 0.95   | 0.96      |
| Res Low        | 5         | [1 4]       | 0.96        | 0.2           | 0.96   | 0.76      |
| Res Mid        | 5         | [2 5]       | 0.955       | 0.2           | 0.88   | 0.86      |
| Faraday        | X         | X           | X           | X             | X      | X         |
| Corral White   | 5         | [2 5]       | 0.94        | 0.2           | 0.38   | 0.40      |

White videos. Note that having a score of 1.00 does not mean perfect detections as only 50 frames were considered in calculating the recall and precision. For example, the Three Droplets video produced false negatives despite having a 1.00 recall. Unfortunately, the Canny method still falls short of making accurate detections on the Faraday video as it is difficult to distinguish Faraday waves from droplets by simply examining edges and circles. While a potentially viable method in controlled experimental conditions, using edge detection may not be the most robust as it dips in performance for the Res Mid video but reported good performances for higher and lower resolutions.

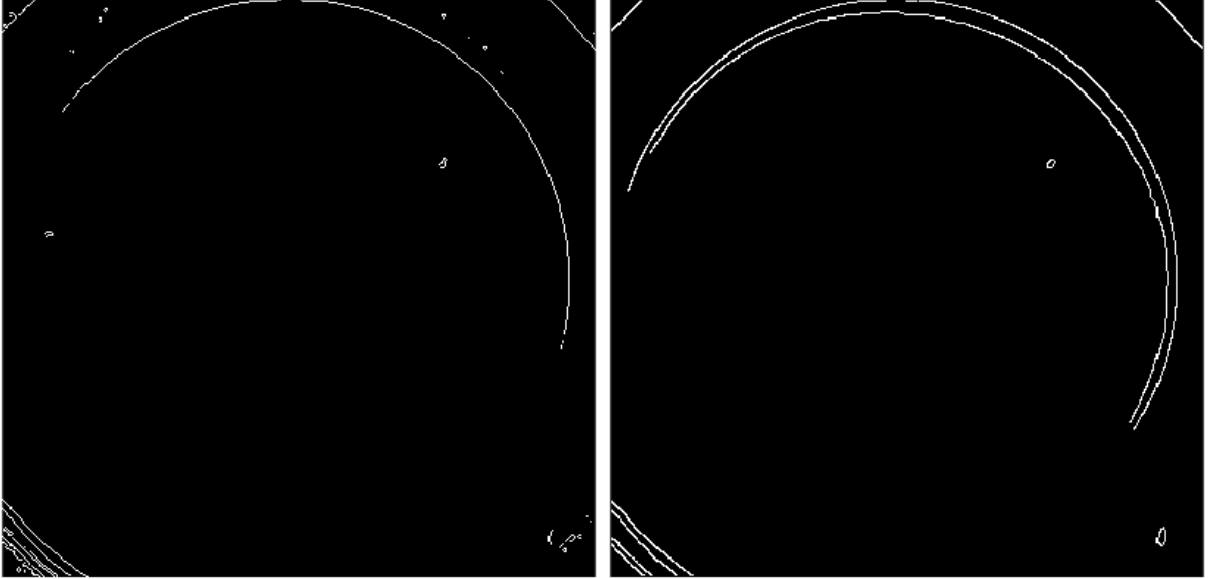

Figure 12: The default Sobel method in MATLAB (left) picks up on the corral imperfections while the Canny method (right) is able to filter out such imperfections.

#### A.1.4 Watershed Transform

The last method we implemented was the watershed transform using MATLAB’s built-in function *watershed*. The watershed transform segments an image into separate regions by treating the image as a topographical map [9]. Readers can see Table 4 for the results. The watershed transform produced high

Table 3: Edge Detection Results

| Experiment     | FudgeFactor | RadiusRange | Sensitivity | EdgeThreshold | Recall | Precision |
|----------------|-------------|-------------|-------------|---------------|--------|-----------|
| Control        | 8           | [2 5]       | 0.93        | 0.5           | 1.00   | 0.98      |
| Lights Off     | 5           | [2 5]       | 0.95        | 0.5           | 1.00   | 1.00      |
| Lights Low     | 9           | [2 5]       | 0.92        | 0.5           | 0.94   | 1.00      |
| Lights High    | 7           | [2 5]       | 0.92        | 0.5           | 1.00   | 1.00      |
| Two Droplets   | 8           | [2 5]       | 0.93        | 0.5           | 1.00   | 1.00      |
| Three Droplets | 8           | [2 5]       | 0.93        | 0.5           | 1.00   | 1.00      |
| Res Low        | 5           | [1 4]       | 0.94        | 0.5           | 1.00   | 1.00      |
| Res Mid        | 6           | [2 5]       | 0.94        | 0.4           | 0.94   | 0.89      |
| Faraday        | X           | X           | X           | X             | X      | X         |
| Corral White   | 14          | [2 5]       | 0.93        | 0.5           | 0.42   | 0.35      |

precision but was the most inconsistent algorithm so far. There is generally a low recall that varied drastically depending on the lighting level. Additionally, the watershed transform was also the only algorithm that failed completely on Res Low and Res Mid videos in addition to Faraday and Corral White videos. Figure 13 demonstrates the watershed transform in action.

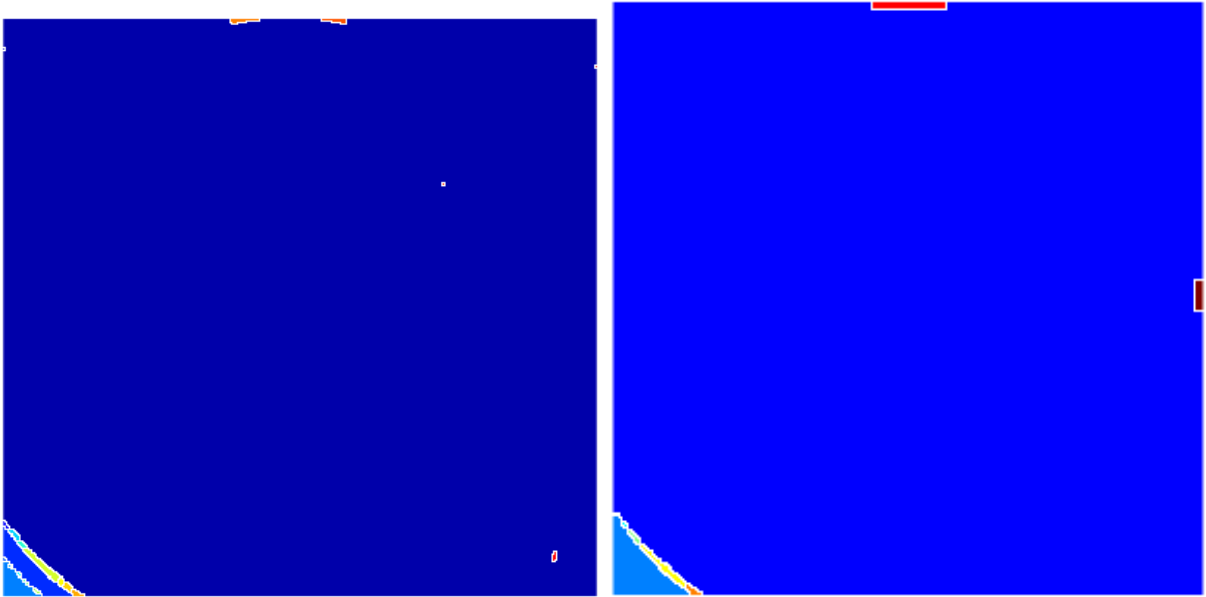

Figure 13: The watershed transform applied to the Control video (left) and the Res Mid video (right).

## A.2 Background Subtraction

Background subtraction algorithms build up a model of the static background to extract moving foreground objects in the form of a black and white foreground mask. We compared and contrasted 3 different background subtraction techniques based on Gaussian mixture models (GMM) to detect and segment the moving droplets from the similarly-colored background [10, 11]. The method MOG [12, 13] is implemented in MATLAB and MOG2 [14] and KNN [15] are both implemented in Python using the OpenCV library. For both of the Python algorithms, we first apply a threshold operation to remove any shadows from the foreground mask. Prior to detecting the droplets, we also utilize an erode then a dilate operation to



Table 4: Watershed Transform Results

| Experiment     | THRradius | RadiusRange | Sensitivity | EdgeThreshold | Recall | Precision |
|----------------|-----------|-------------|-------------|---------------|--------|-----------|
| Control        | 5         | [2 5]       | 0.97        | 0.1           | 0.68   | 1.00      |
| Lights Off     | 5         | [2 5]       | 0.97        | 0.1           | 0.3    | 1.00      |
| Lights Low     | 5         | [2 5]       | 0.97        | 0.1           | 0.98   | 1.00      |
| Lights High    | 5         | [2 5]       | 0.97        | 0.1           | 0.76   | 0.90      |
| Two Droplets   | 5         | [2 5]       | 0.97        | 0.1           | 0.74   | 1.00      |
| Three Droplets | 5         | [2 5]       | 0.97        | 0.1           | 0.63   | 1.00      |
| Res Low        | X         | X           | X           | X             | X      | X         |
| Res Mid        | X         | X           | X           | X             | X      | X         |
| Faraday        | X         | X           | X           | X             | X      | X         |
| Corral White   | X         | X           | X           | X             | X      | X         |

remove noise from the mask (except for MOG2 and KNN when applied to the Res Low video, KNN when applied to the Res Mid video, and all algorithms when applied to the Corral White video). For the MOG algorithm implemented in MATLAB, we used 5 training frames and a training rate of 0.0001 while only detecting blobs with a minimum area of 10 (3 for Res Low and 5 for Res Mid).

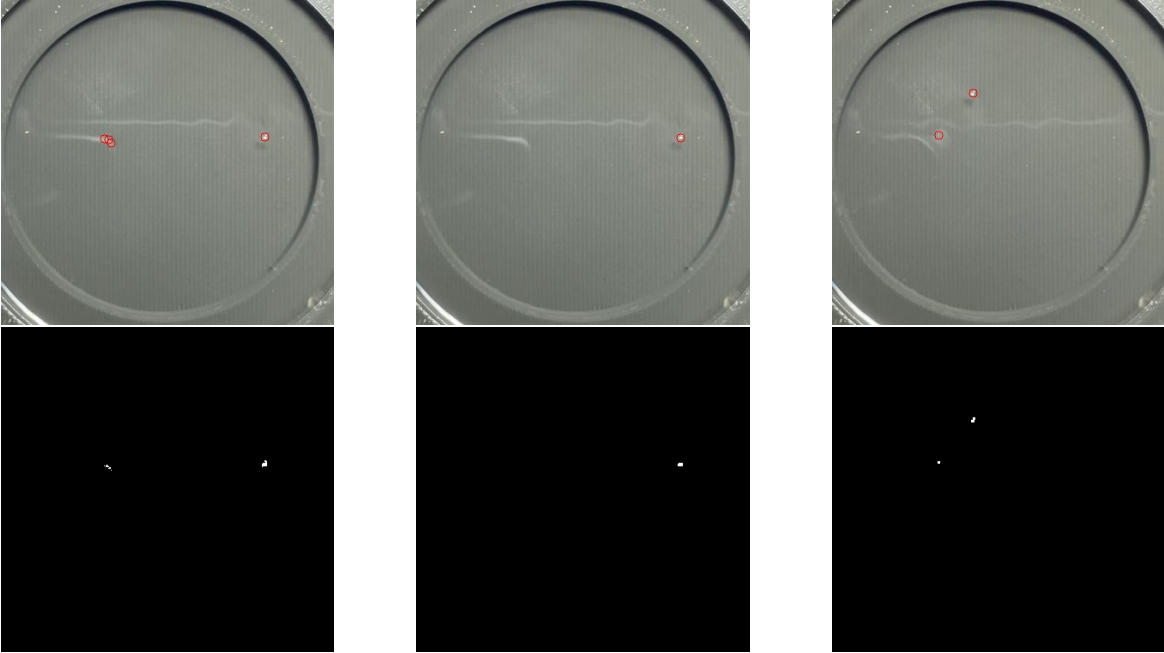

Figure 14: From left to right: frame 1 before applying erosion and dilation, frame 1 after applying erosion and dilation, and frame 2. Top images show the video post droplet detection and the bottom images show the foreground mask.

Without the erosion and dilation operations, noise within the videos translates to noise in the foreground masks which then induce false positives. We can see this in one frame (frame 1) when the KNN algorithm is applied to the Control video (as shown to the left of Figure 14). Applying the erosion and dilation operations removes most noise within the foreground mask (as shown in the middle of Figure 14). However, some noise have a large enough area such that the morphological operations are unable to remove them from the foreground mask, which then leads to false positive detections. This can be

seen in another frame (frame 2) of the same experiment (as shown to the right of Figure 14). We can potentially eliminate these false positives by increasing the number of iterations that we apply the erosion and dilation operations, but doing so will drastically decrease the recall since droplets are often erased from the foreground mask as well.

Table 5: Background Subtraction Results

| Experiment     | MOG (MATLAB) |           | MOG2 (Python) |           | KNN (Python) |           |
|----------------|--------------|-----------|---------------|-----------|--------------|-----------|
|                | Recall       | Precision | Recall        | Precision | Recall       | Precision |
| Control        | 0.98         | 1.00      | 0.96          | 0.70      | 0.98         | 1.00      |
| Lights Off     | 0.74         | 1.00      | 0.98          | 1.00      | 0.98         | 1.00      |
| Lights Low     | 1.00         | 1.00      | 0.98          | 0.88      | 1.00         | 1.00      |
| Lights High    | 0.98         | 0.98      | 1.00          | 0.65      | 1.00         | 1.00      |
| Two Droplets   | 0.98         | 1.00      | 0.98          | 0.87      | 0.99         | 1.00      |
| Three Droplets | 0.99         | 0.99      | 0.97          | 0.88      | 0.99         | 1.00      |
| Res Low        | 0.98         | 1.00      | 1.00          | 0.96      | 1.00         | 1.00      |
| Res Mid        | 0.98         | 1.00      | 0.96          | 0.8       | 1.00         | 1.00      |
| Faraday        | X            | X         | X             | X         | X            | X         |
| Corral White   | 0.24         | 1.00      | 0.26          | 0.93      | 0.10         | 1.00      |

As expected, the motion of the Faraday waves caused all background subtraction algorithms to fail for the Faraday video. Movement in the background makes it impossible to extract the foreground based on motion. Otherwise, the KNN algorithm outperformed both MOG and MOG2 with a high recall and precision for all videos except Corral White. Again, note that having a score of 1.00 does not mean perfect detections as only 50 frames were considered in calculating the recall and precision. For example, the KNN algorithm had occasional false positive detections despite a precision score of 1.00 on most videos. While all algorithms failed to detect droplets occasionally, MOG also failed to detect droplets in a large proportion of frames for the Lights Off video. MOG2 was imprecise in general and made a significant amount of false detections in all but the Lights Off and Res Low videos. Compared to image processing techniques, background subtraction methods require less parameter tuning and do not produce false positives on 3D printing imperfections of the corral. The KNN algorithm, while not perfect, generally offers more consistency compared to image processing methods and can be viable in controlled settings. However, background subtraction algorithms do require the camera and setup to remain perfectly fixed and undisturbed throughout the experiment. Additionally, the frames of a video must be processed in chronological order.

### A.3 Viola-Jones Algorithm

The Viola-Jones Algorithm is a supervised machine learning algorithm used for object detection [16]. Supervised machine learning algorithms detect objects by training on a set of labelled training images in which rectangular bounding boxes are marked around each object of interest, and in our case droplet. We implemented the Viola-Jones Algorithm through MATLAB’s *CascadeObjectDetector* and used roughly 125 labelled training images per video and 6899 negative images [17] (although only about 250 negative samples per droplet were used by the detector at each training stage). The parameters used during training were *NumCascadeStages*, *FalseAlarmRate*, *ObjectTrainingSize*, and *FeatureType*. We kept *TruePositiveRate*=0.999 the same for all videos. The results below in Table 6 were obtained by only keeping bounding boxes below an area of 200.

The Viola-Jones algorithm was designed primarily for face detection. Therefore, the low performance

Table 6: Viola-Jones Results

| Experiment     | Stages | FalseAlarm | TrainingSize | FeatureType | Recall | Precision |
|----------------|--------|------------|--------------|-------------|--------|-----------|
| Control        | 6      | 0.02       | [10 10]      | LBP         | 0.44   | 1.00      |
| Lights Off     | 4      | 0.02       | [10 10]      | LBP         | 0.42   | 1.00      |
| Lights Low     | 4      | 0.01       | [10 10]      | LBP         | 0.28   | 0.88      |
| Lights High    | 5      | 0.25       | [10 10]      | Haar        | 0.28   | 0.88      |
| Two Droplets   | 4      | 0.2        | [10 10]      | Haar        | 0.2    | 0.80      |
| Three Droplets | 4      | 0.1        | [10 10]      | Haar        | 0.21   | 1.00      |
| Res Low        | X      | X          | X            | X           | X      | X         |
| Res Mid        | 4      | 0.2        | [10 10]      | Haar        | 0.28   | 1.00      |
| Faraday        | X      | X          | X            | X           | X      | X         |
| Corral White   | X      | X          | X            | X           | X      | X         |

is perhaps not a surprise when it comes to droplet detection. Ultimately, the minuscule, low resolution, and minimally textured droplets stand in stark contrast to highly textured faces. We obtained a low recall using the Viola-Jones algorithm for all videos and could not achieve successful detections on the Res Low, Faraday, and Corral White videos. For videos with multiple droplets, only one detection was able to be made on each frame. Although the Viola-Jones algorithm trains much faster than YOLOv5, its low performance makes it unviable as an option for droplet detection.

## 4 Trajectory Tracking Videos

As noted above, the codes, datasets, and results discussed in this study are available in our GitHub repository [1]. We highly encourage reader to examine the materials presented therein. All the experiment videos, annotations used for model training, real-time tracking videos achieved by the methodology described in the paper can be downloaded from this repository.

Here, we provide results only for the Three Droplets Experiment part of the supplementary material. All files, including the current document, are zipped into a single file named *"supp-material.zip"*. Inside this zip file, *three-droplet-experiment* folder includes the real-time tracking results of the corresponding experiment. There are three types of results associated with each experiment. In this case, *three-droplet\_trace.avi* displays the evolution of the trajectory of the object of interests in real time while *three-droplet\_bb.avi* shows only the bounding boxes with object IDs. *three-droplet.csv* is the extracted trajectories. For a single object, it has the following structure.

| frame_id | time | x1     | y1     | c1   | dx1   | dy1   | speed1 |
|----------|------|--------|--------|------|-------|-------|--------|
| 1        | 0.00 | 107.81 | 106.54 | 0.85 | 0.00  | 0.00  | 0.00   |
| 2        | 0.03 | 107.69 | 107.07 | 0.85 | -3.47 | 15.89 | 16.26  |
| 3        | 0.07 | 107.87 | 108.14 | 0.85 | 5.43  | 32.11 | 32.56  |
| 4        | 0.10 | 108.10 | 108.95 | 0.86 | 6.94  | 24.29 | 25.26  |
| 5        | 0.13 | 108.25 | 110.02 | 0.84 | 4.27  | 31.88 | 32.17  |
| .        | .    | .      | .      | .    | .     | .     | .      |
| .        | .    | .      | .      | .    | .     | .     | .      |
| .        | .    | .      | .      | .    | .     | .     | .      |

Explanation of the columns is as follows;

**frame\_id** ID of the frame where the object is detected.

**time** time stamp of the frame associated with frame\_id.

**x1**  $x$  coordinate of the center of the bounding box.

**y1**  $y$  coordinate of the center of the bounding box.

**c1** confidence score associated with this detection.

**dx1**  $x$ -velocity with respect the previous detected frame.

**dy1**  $y$ -velocity with respect the previous detected frame.

**speed1**  $y$ -speed with respect the previous detected frame.

In the case of experiments involving multiple droplets or intruders, we include separate columns associated with each object. It is important to note that we only consider a detection valid if the number of detections exactly matches the number of objects present in the experiment and if all confidence scores associated with these detections are above a certain threshold. Consequently, each frame that meets these criteria contains all the necessary information regarding the object(s) of interest.

## Acknowledgements

The authors acknowledge support from the National Science Foundation AI Institute in Dynamic Systems (grant number 2112085). JNK further acknowledges support from the Air Force Office of Scientific Research (FA9550-19-1-0011).

## References

- [1] Erdi Kara. <https://github.com/erkara/trackingdroplets>, 2022.
- [2] Joseph Redmon, Santosh Divvala, Ross Girshick, and Ali Farhadi. You only look once: Unified, real-time object detection. In *Proceedings of the IEEE conference on computer vision and pattern recognition*, pages 779–788, 2016.
- [3] Richard O. Duda and Peter E. Hart. Use of the hough transformation to detect lines and curves in pictures. *Commun. ACM*, 15(1):11–15, jan 1972.
- [4] HK Yuen, J Princen, J Illingworth, and J Kittler. Comparative study of hough transform methods for circle finding. *Image and Vision Computing*, 8(1):71–77, 1990.
- [5] T.J. Atherton and D.J. Kerbyson. Size invariant circle detection. *Image and Vision Computing*, 17(11):795–803, 1999.
- [6] Suman Thapar and Shevani Garg. Study and implementation of various morphology based image contrast enhancement techniques. *Int. J. Comput. Bus. Res*, 128:2229–6166, 2012.
- [7] MathWorks. Find edges in 2-D grayscale image - MATLAB edge, 2011.
- [8] John Canny. A computational approach to edge detection. *IEEE Transactions on Pattern Analysis and Machine Intelligence*, PAMI-8(6):679–698, 1986.
- [9] Fernand Meyer. Topographic distance and watershed lines. *Signal Processing*, 38(1):113–125, 1994. Mathematical Morphology and its Applications to Signal Processing.

- [10] Nir Friedman and Stuart Russell. Image segmentation in video sequences: A probabilistic approach, 2013.
- [11] Imane Benraya and Nadja Benblidia. Comparison of background subtraction methods. In *2018 International Conference on Applied Smart Systems (ICASS)*, pages 1–5, 2018.
- [12] C. Stauffer and W. Eric L. Grimson. Adaptive background mixture models for real-time tracking. *Proceedings. 1999 IEEE Computer Society Conference on Computer Vision and Pattern Recognition (Cat. No PR00149)*, 2:246–252 Vol. 2, 1999.
- [13] Pakorn KaewTrakulPong and R. Bowden. An improved adaptive background mixture model for realtime tracking with shadow detection. 2002.
- [14] Z. Zivkovic. Improved adaptive gaussian mixture model for background subtraction. In *Proceedings of the 17th International Conference on Pattern Recognition, 2004. ICPR 2004.*, volume 2, pages 28–31 Vol.2, 2004.
- [15] Zoran Zivkovic and Ferdinand van der Heijden. Efficient adaptive density estimation per image pixel for the task of background subtraction. *Pattern Recognition Letters*, 27(7):773–780, 2006.
- [16] P. Viola and M. Jones. Rapid object detection using a boosted cascade of simple features. In *Proceedings of the 2001 IEEE Computer Society Conference on Computer Vision and Pattern Recognition. CVPR 2001*, volume 1, pages I–I, 2001.
- [17] Prasun Roy, Subhankar Ghosh, Saumik Bhattacharya, and Umapada Pal. Effects of degradations on deep neural network architectures. *arXiv preprint arXiv:1807.10108*, 2018.
